# Supplementary material for: Nutrient Content and Compliance with Sodium Standards in Elementary School Meals in the United States Pre- and Post-COVID-19
Source: MDPI journal article supplement (doi:10.3390/nu14245386), 2022-12-19
Supplement: s1 [file s1]

**Supplemental Table S1. USDA Sodium Targets for School Meals.**

| BREAKFAST         |                                         |                                                  |                            |                                    |
|-------------------|-----------------------------------------|--------------------------------------------------|----------------------------|------------------------------------|
| Age / Grade Group | Target 1 (SY 2022-23) <sup>1</sup> (mg) | Interim Target 1A (SY 2023-24) <sup>2</sup> (mg) | Target 2 <sup>3</sup> (mg) | Target 3 (Final) <sup>4</sup> (mg) |
| K-5               | ≤ 540                                   | N/A                                              | ≤ 485                      | ≤ 430                              |
| 6-8               | ≤ 600                                   | N/A                                              | ≤ 535                      | ≤ 470                              |
| 9-12              | ≤ 640                                   | N/A                                              | ≤ 570                      | ≤ 500                              |
| LUNCH             |                                         |                                                  |                            |                                    |
| Age / Grade Group | Target 1 (SY 2022-23) <sup>1</sup> (mg) | Interim Target 1A (SY 2023-24) <sup>2</sup> (mg) | Target 2 <sup>3</sup> (mg) | Target 3 (Final) <sup>4</sup> (mg) |
| K-5               | ≤ 1,230                                 | ≤ 1,110                                          | ≤ 935                      | ≤ 640                              |
| 6-8               | ≤ 1,360                                 | ≤ 1,225                                          | ≤ 1,035                    | ≤ 710                              |
| 9-12              | ≤ 1,420                                 | ≤ 1,280                                          | ≤ 1,080                    | ≤ 740                              |

SY: School year; USDA: United States Department of Agriculture

<sup>1</sup>Target 1 standards were established in the 2012 final rule and implemented during SY 2014-15.

<sup>2</sup>Target 1A standards were established in the 2022 USDA “Transitional Standards for Milk, Whole Grains and Sodium” to be implemented during SY 2023-24 for lunch (breakfasts will remain at the original Target 1 standards during SY 2023-24).

<sup>3</sup>Target 2 standards were originally established in the 2012 final rule to be implemented during SY 2017-18, but were then delayed and ultimately eliminated by the USDA. (The USDA has not yet issued a proposed rule for the longer-term school meal nutrition standards.) <https://www.fns.usda.gov/cn/fr-121218>

<sup>4</sup>Target 3 standards were originally established in the 2012 final rule to be implemented during SY 2022-23, but were later eliminated by the USDA. <https://www.fns.usda.gov/cn/fr-121218>

**Supplemental Table S2.** Average (SD) Student Population Size Among n=128 School Districts in a Nationally Representative Sample by Region and Size Tier.

| Size Tier              | Region               |                     |                     |                      |                        |                      |                      |                      |
|------------------------|----------------------|---------------------|---------------------|----------------------|------------------------|----------------------|----------------------|----------------------|
|                        | Northeast (n=14)     | Mid-Atlantic (n=20) | Southeast (n=22)    | Midwest (n=16)       | Mountain Plains (n=17) | Southwest (n=20)     | West (n=19)          | Overall (n=128)      |
| <b>Tier 1 (n=14)</b>   | 164<br>(183)         | 220<br>(106)        | 284<br>(134)        | 328<br>(183)         | 288<br>(177)           | 171<br>(89)          | 311<br>(146)         | 252<br>(134)         |
| <b>Tier 2 (n=14)</b>   | 1,225<br>(322)       | 1,360<br>(193)      | 1,322<br>(529)      | 1,168<br>(225)       | 1,072<br>(314)         | 1,092<br>(187)       | 1,700<br>(228)       | 1,277<br>(305)       |
| <b>Tier 3 (n=14)</b>   | 2,370<br>(504)       | 2,533<br>(434)      | 2,122<br>(33)       | 2,232<br>(153)       | 2,982<br>(236)         | 2,880<br>(1,198)     | 4,005<br>(383)       | 2,732<br>(739)       |
| <b>Tier 4 (n=14)</b>   | 5,194<br>(6)         | 5,288<br>(374)      | 4,576<br>(57)       | 5,257<br>(480)       | 5,976<br>(1,245)       | 5,853<br>(1,107)     | 4,983<br>(53)        | 5,304<br>(677)       |
| <b>Tier 5 (n=14)</b>   | 7,574<br>(285)       | 8,194<br>(315)      | 8,462<br>(560)      | 8,382<br>(2,107)     | 7,810<br>(120)         | 8,633<br>(2,069)     | 8,559<br>(1,294)     | 8,230<br>(993)       |
| <b>Tier 6 (n=14)</b>   | 12,894<br>(3,310)    | 14,302<br>(3,946)   | 15,696<br>(1,198)   | 11,468<br>(959)      | 14,011<br>(4,675)      | 17,076<br>(2,039)    | 11,648<br>(232)      | 13,871<br>(2,854)    |
| <b>Tier 7 (n=13)</b>   | 24,439 <sup>†</sup>  | 24,452<br>(1,178)   | 23,529<br>(3,692)   | 24,026<br>(2,848)    | 21,766<br>(2,830)      | 23,804<br>(2,848)    | 24,540<br>(2,614)    | 23,898<br>(2,263)    |
| <b>Tier 8 (n=8)</b>    | *                    | 35,730<br>(6,812)   | 30,312<br>(2,587)   | 34,284 <sup>†</sup>  | 33,661<br>(5,853)      | 32,370<br>(703)      | 32,496<br>(6,476)    | 33,038<br>(4,037)    |
| <b>Tier 9 (n=5)</b>    | *                    | 56,942<br>(6,087)   | 46,464<br>(722)     | *                    | 43,328 <sup>†</sup>    | 46,252<br>(5,067)    | 61,584 <sup>†</sup>  | 50,528<br>(7,456)    |
| <b>Tier 10 (n=5)</b>   | *                    | 75,799<br>(10,996)  | 71,402<br>(10,827)  | *                    | *                      | 75,221 <sup>†</sup>  | *                    | 73,924<br>(8,056)    |
| <b>Tier 11 (n=7)</b>   | 470,656 <sup>†</sup> | *                   | 140,734<br>(25,132) | 169,384 <sup>†</sup> | *                      | 105,649 <sup>†</sup> | 228,826<br>(112,607) | 212,115<br>(131,697) |
| <b>Overall (n=128)</b> | 39,567<br>(124,259)  | 22,582<br>(25,612)  | 31,355<br>(41,920)  | 19,337<br>(41,250)   | 12,851<br>(13,591)     | 22,857<br>(27,856)   | 36,608<br>(74,388)   | 26,374<br>(56,284)   |

<sup>†</sup> Only one district met the sample selection criteria.

<sup>‡</sup> This district operates two distinct food service models: a "scratch cooked" menu and a "pre-packaged" menu. Both menus were included as "separate" districts.

\* No district met the sample selection criteria.

**Supplemental Table S3.** Elementary Schools Excluded from the 2022 Analysis (n=37).\*

| 2022 EXCLUDED SCHOOLS |                        |           |
|-----------------------|------------------------|-----------|
| School District       | Region                 | Tier Size |
| School 1              | Mid-Atlantic Region    | 6         |
| School 2              | Mid-Atlantic Region    | 10        |
| School 3              | Mountain Plains Region | 5         |
| School 4              | Mountain Plains Region | 7         |
| School 5              | Midwest Region         | 3         |
| School 6              | Midwest Region         | 3         |
| School 7              | Midwest Region         | 4         |
| School 8              | Midwest Region         | 6         |
| School 9              | Midwest Region         | 7         |
| School 10             | Midwest Region         | 8         |
| School 11             | Midwest Region         | 11        |
| School 12             | Northeast Region       | 1         |
| School 13             | Northeast Region       | 2         |
| School 14             | Northeast Region       | 3         |
| School 15             | Northeast Region       | 4         |
| School 16             | Northeast Region       | 6         |
| School 17             | Southeast Region       | 1         |
| School 18             | Southeast Region       | 1         |
| School 19             | Southeast Region       | 2         |
| School 20             | Southeast Region       | 3         |
| School 21             | Southeast Region       | 4         |
| School 22             | Southeast Region       | 4         |
| School 23             | Southeast Region       | 5         |
| School 24             | Southeast Region       | 6         |
| School 25             | Southeast Region       | 8         |
| School 26             | Southeast Region       | 9         |
| School 27             | Southwest Region       | 2         |
| School 28             | Southwest Region       | 2         |
| School 29             | Southwest Region       | 4         |
| School 30             | Southwest Region       | 4         |
| School 31             | Southwest Region       | 7         |
| School 32             | Southwest Region       | 8         |
| School 33             | Southwest Region       | 9         |

|           |             |   |
|-----------|-------------|---|
| School 34 | West Region | 1 |
| School 35 | West Region | 2 |
| School 36 | West Region | 4 |
| School 37 | West Region | 9 |

\*Schools were excluded because menu and/or nutrient data were not found for 2022.

**Supplemental Table S4.** Average nutrient contents of school breakfasts and lunch, compared to USDA standards, in a nationally representative sample of elementary (K-5) school breakfast and lunch menus in 2019 and 2022.

| Meal Type | Year | USDA Standards<br>Versus Nutrient Averages | Nutrients <sup>a</sup>               |                                   |                         |                                       |                                      |                                      |
|-----------|------|--------------------------------------------|--------------------------------------|-----------------------------------|-------------------------|---------------------------------------|--------------------------------------|--------------------------------------|
|           |      |                                            | Calories<br>(range [kcal])           | Saturated Fat <sup>b</sup><br>(g) | Sodium Target 1<br>(mg) | Sodium Target<br>1A (mg) <sup>c</sup> | Sodium Target 2<br>(mg) <sup>d</sup> | Sodium Target 3<br>(mg) <sup>d</sup> |
| Breakfast | 2019 | USDA Standard                              | 350 - 500                            | 3.9 - 5.6                         | ≤ 540                   | N/A                                   | ≤ 485                                | ≤ 430                                |
|           |      | Average (95% CI)                           | 373<br>(370 – 376)                   | 2.8<br>(2.7 – 2.9)                | 399<br>(394 – 404)      |                                       |                                      |                                      |
|           |      | Difference<br>(Average - USDA Standard)    | -127 <sup>e</sup> – +23 <sup>f</sup> | -2.8 – -1.1                       | -141                    | N/A                                   | -86                                  | -31                                  |
|           |      | USDA Breakfast Standards                   | Met Requirement                      | Met Requirement                   | Met Requirement         | N/A                                   | Met Target <sup>d</sup>              | Met Target <sup>d</sup>              |
|           | 2022 | USDA Standard                              | 350 - 500                            | 3.9 - 5.6                         | ≤ 540                   | N/A                                   | ≤ 485                                | ≤ 430                                |
|           |      | Average (95% CI)                           | 355<br>(351 – 358)                   | 2.7<br>(2.6 – 2.7)                | 362<br>(356 – 368)      |                                       |                                      |                                      |
|           |      | Difference<br>(Average - USDA Standard)    | -145 – +5                            | -2.9 – -1.2                       | -178                    | N/A                                   | -123                                 | -68                                  |
|           |      | USDA Breakfast Standards                   | Met Requirement                      | Met Requirement                   | Met Requirement         | N/A                                   | Met Target <sup>d</sup>              | Met Target <sup>d</sup>              |
| Lunch     | 2019 | USDA Standard                              | 550 - 650                            | 6.1 - 7.2                         | ≤ 1,230                 | ≤ 1,110                               | ≤ 935                                | ≤ 640                                |
|           |      | Average (95% CI)                           | 582<br>(577 – 586)                   | 5.7<br>(5.6 – 5.8)                | 875<br>(865 – 885)      |                                       |                                      |                                      |
|           |      | Difference<br>(Average - USDA Standard)    | -68 – +32                            | -1.5 – -0.4                       | -355                    | -235                                  | -60                                  | 235                                  |
|           |      | USDA Lunch Standards                       | Met Requirement                      | Met Requirement                   | Met Requirement         | Met Target <sup>c</sup>               | Met Target <sup>d</sup>              | Did not Meet<br>Target <sup>d</sup>  |
|           | 2022 | USDA Standard                              | 550 - 650                            | 6.1 - 7.2                         | ≤ 1,230                 | ≤ 1,110                               | ≤ 935                                | ≤ 640                                |

|  |                                         |                    |                    |                    |                         |                         |                                     |
|--|-----------------------------------------|--------------------|--------------------|--------------------|-------------------------|-------------------------|-------------------------------------|
|  | Average (95% CI)                        | 575<br>(571 – 580) | 5.9<br>(5.8 – 6.0) | 833<br>(822 – 844) |                         |                         |                                     |
|  | Difference<br>(Average - USDA Standard) | -75 – +25          | -1.3 – -0.2        | -397               | -277                    | -102                    | 193                                 |
|  | USDA Lunch Standards                    | Met Requirement    | Met Requirement    | Met Requirement    | Met Target <sup>c</sup> | Met Target <sup>d</sup> | Did not Meet<br>Target <sup>d</sup> |

<sup>a</sup>There are no USDA nutrient requirements for total fat, fiber, or total sugar for reimbursable breakfast and lunch meals. Nutrient targets are averaged over the week.

<sup>b</sup>Based on saturated fat limits of <10% of the average weekly meal maximum for calories (350-500 kcal for breakfast and 550-650 kcal for lunch for grades K-5).

<sup>c</sup>This target will go into effect in SY 2023-24 for lunch (breakfasts will remain at the original Target 1 standards during this time).

<sup>d</sup>This is no longer a USDA target for school meals.

<sup>e</sup>Calculated based on the upper range for the USDA requirement.

<sup>f</sup>Calculated based on the lower range for the USDA requirement.

**Supplemental Table S5.** Percent of average *daily meals* and *weekly meals*, including condiments that met or were close to meeting sodium reduction targets in a nationally representative sample of elementary (K-5) school breakfast and lunch menus in 2022.

|                             | SBP               |                                                  | NSLP              |                                                  |
|-----------------------------|-------------------|--------------------------------------------------|-------------------|--------------------------------------------------|
| Target                      | % that Met Target | % that were Close to Meeting Target (within 10%) | % that Met Target | % that were Close to Meeting Target (within 10%) |
| Average Daily Meals         |                   |                                                  |                   |                                                  |
| Target 1 <sup>a</sup>       | 93.4              | 95.9                                             | 89.9              | 95.4                                             |
| Target 1a <sup>b</sup>      | N/A               | N/A                                              | 82.3              | 89.3                                             |
| Target 2 <sup>c</sup>       | 88.4              | 92.6                                             | 55.7              | 72.0                                             |
| Final Target 3 <sup>d</sup> | 77.6              | 86.0                                             | 14.8              | 20.5                                             |
| Average Week                |                   |                                                  |                   |                                                  |
| Target 1 <sup>a</sup>       | 97.1              | 98.2                                             | 97.0              | 98.8                                             |
| Target 1a <sup>b</sup>      | N/A               | N/A                                              | 90.2              | 96.7                                             |
| Target 2 <sup>c</sup>       | 93.2              | 96.6                                             | 56.3              | 77.0                                             |
| Final Target 3 <sup>d</sup> | 78.8              | 90.3                                             | 11.2              | 16.1                                             |

<sup>a</sup>Target 1 requirements are ≤540 mg of sodium per breakfast meal and ≤1,230 mg of sodium per lunch meal averaged over the week.

<sup>b</sup>Target 1a requirements are ≤ 1,110 mg of sodium per lunch meal averaged over the week.

<sup>c</sup>Target 2 requirements are ≤ 485 mg of sodium per breakfast meal and ≤ 935 mg of sodium per lunch meal averaged over the week (note: this is no longer a target for school meals).

<sup>d</sup>The final target requirements are  $\leq 430$  mg of sodium per breakfast meal and  $\leq 640$  mg of sodium per lunch meal averaged over the week (note: this is no longer a target for school meals).

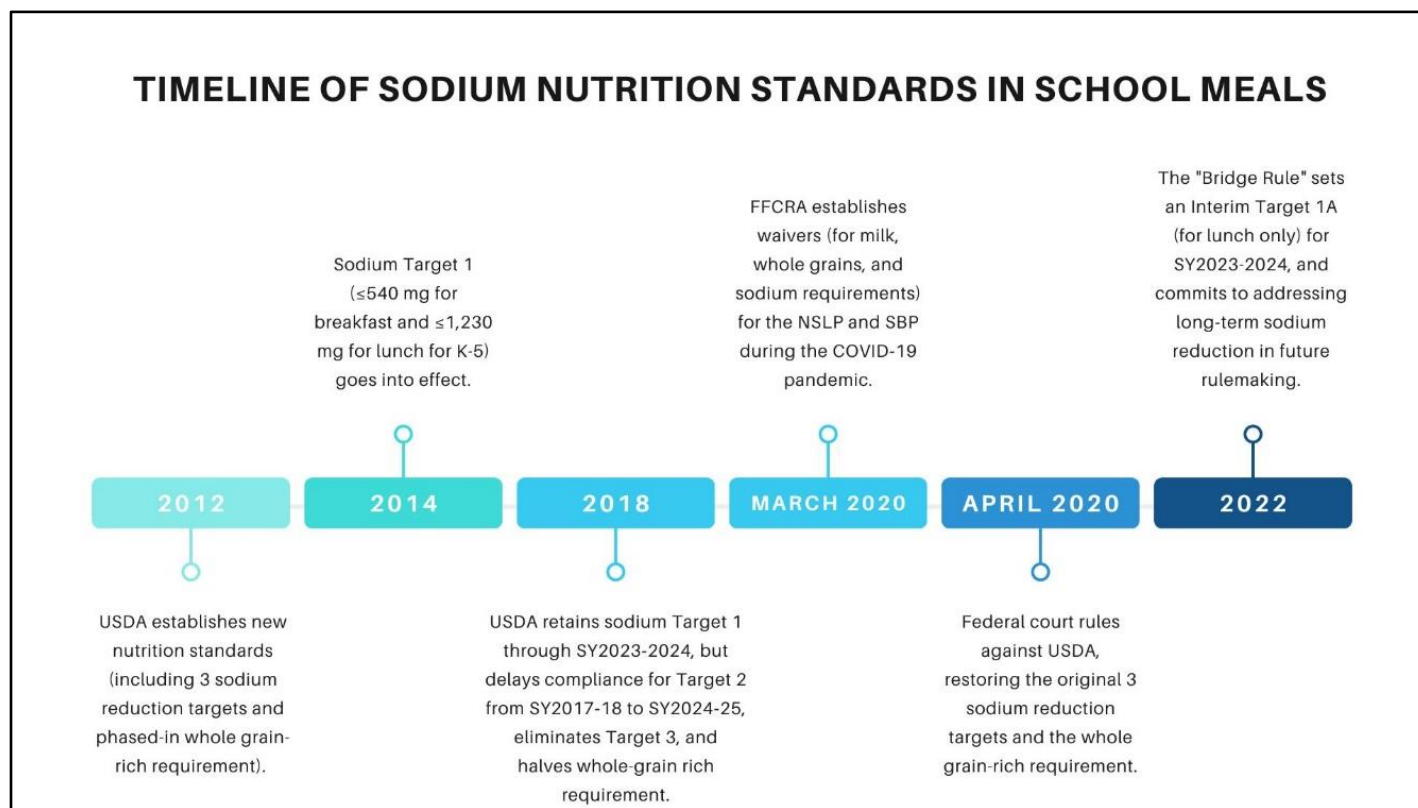

**Supplemental Figure S1.** Timeline of Sodium Standard for School Meals.

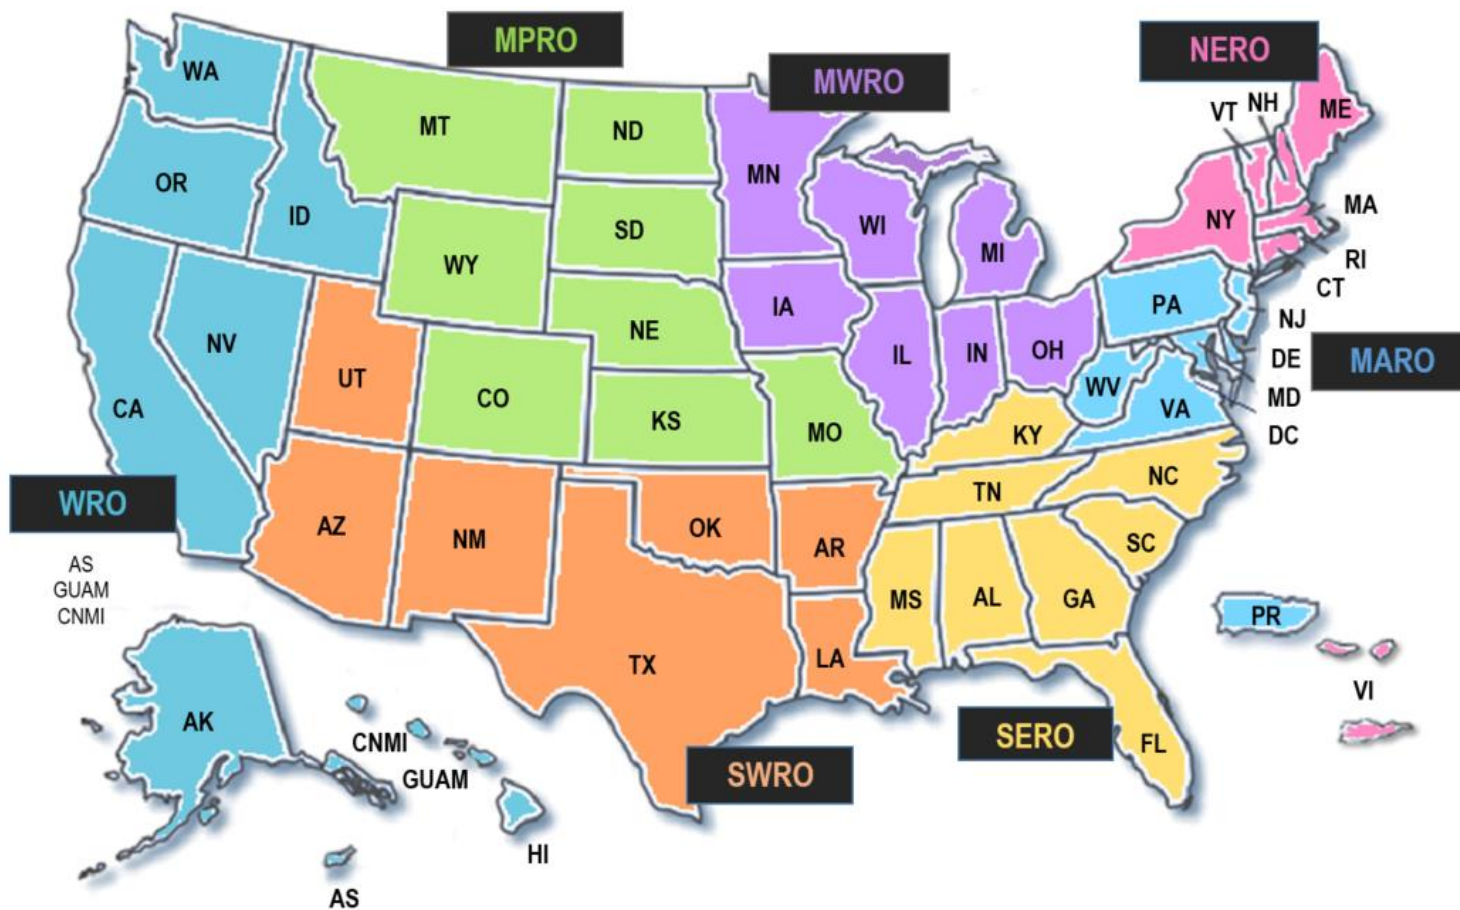

Supplemental Figure S2. USDA Food and Nutrition Service Region<sup>1</sup>

<sup>1</sup> Source: <https://www.fns.usda.gov/fns-regional-offices>
